# Supplementary material for: A copper(ii)–ethylenediamine modified polyoxoniobate with photocatalytic H2 evolution activity under visible light irradiation
Source: Royal Society of Chemistry journal article supplement (doi:10.1039/c2dt30663h), 2012-01-01
Supplement: c2dt30663h.pdf [file c2dt30663h.pdf]

## Supporting Information

### **A Copper(II)–ethylenediamine modified polyoxoniobate with photocatalytic H<sub>2</sub> evolution activity under visible light irradiation**

Zhen-Li Wang,<sup>a</sup> Hua-Qiao Tan,<sup>a</sup> Wei-Lin Chen,<sup>\*a</sup> Yang-Guang Li<sup>a</sup> and En-Bo Wang<sup>\*a</sup>

*Department of Chemistry, Key Laboratory of Polyoxometalates Science of Ministry of Education, Northeast Normal University, Changchun, 130024, China. Fax: (+86) 431-85098787, E-mail: wangeb889@nenu.edu.cn, chenwl2007@yahoo.com.cn*

#### ***Experiment Section***

**General Information:** Unless otherwise stated, all chemicals used were analytical grade, commercially available and used without further purification. K<sub>8</sub>[Nb<sub>6</sub>O<sub>19</sub>] · 16H<sub>2</sub>O and Co<sup>III</sup>(dmgH)<sub>2</sub>pyCl were prepared according to the literatures 1 and 2 methods, respectively. Elemental analyses (H, C, and N) were performed using a Perkin–Elmer 2400 CHN elemental analyzer; K, Nb, Cu and Co were analyzed on a PLASMA-SPEC(I) ICP atomic emission spectrometer; FT-IR spectra of the samples were recorded in the range of 400–4000 cm<sup>-1</sup> on an Alpha Centaur FT/IR spectrophotometer using KBr pellets. The UV-Visible diffuse reflectance spectra were recorded at ambient temperature on a Cary-500 UV-vis Spectrophotometer. The thermal gravimetric analysis (TGA) was carried out performed on a Perkin-Elmer TGA-7 instrument under flowing N<sub>2</sub> with a heating rate of 10°C / min at 20-1000°C; Powder X-ray diffraction (PXRD) measurements were characterized using a D/max200PC X-ray powder diffractometer with Cu-K $\alpha$  radiation ( $\lambda$ = 1.5418 Å) and a Lynx Eye detector at a scanning rate of 10°/min in the 2 $\theta$  range of 5° to 50°. GC analyses were performed on GC-7890T instrument with a thermal conductivity detector and a 5 Å molecular sieve column (2 mm × 2 m) using N<sub>2</sub> as carrying gas.

## Synthesis of Compound 1

$\text{Co}^{\text{III}}(\text{dmgH})_2\text{pyCl}$  (structure is shown in Scheme S1) was synthesized according to the literature.<sup>1</sup> Anal. Calcd. for  $\text{C}_{13}\text{H}_{19}\text{N}_5\text{O}_4\text{ClCo}$ : C, 38.67; H, 4.74; N, 17.35; Co, 14.60. Found: C, 38.63; H, 4.79; N, 17.40; Co, 14.64.  $\text{K}_8[\text{Nb}_6\text{O}_{19}] \cdot 16\text{H}_2\text{O}$  (**1a**) was synthesized according to the literature.<sup>2</sup> Anal. Calcd. for  $\text{K}_8[\text{Nb}_6\text{O}_{19}] \cdot 16\text{H}_2\text{O}$  (%): K, 21.39. Nb, 38.12. H, 2.19. Found (%): K, 21.36. Nb, 38.16. H, 2.22.

The synthetic section as shown in the text (yield: 55% based on  $\text{K}_8[\text{Nb}_6\text{O}_{19}] \cdot 16\text{H}_2\text{O}$ ). Anal. Calcd for  $[\text{Cu}(\text{en})_2]_{11}\text{K}_6\text{Na}_2[\text{Nb}_{24}\text{O}_{72}\text{H}_9]_2 \cdot 120\text{H}_2\text{O}$  (**1**) (%): K, 2.09; Na, 0.41; Nb, 39.66; Cu, 6.21; C, 4.70; H, 3.89; N, 5.48. Found (%): K, 2.01; Na, 0.33; Nb, 39.60; Cu, 6.26; C, 4.78; H, 3.96; N, 5.54. IR (KBr pellet): 3222(s,  $\nu_{\text{O-H}}$ ), 3121(s,  $\nu_{\text{N-H}}$ ), 1588(s,  $\nu_{\text{C-N}}$ ), 1458 (m,  $\nu_{\text{C-C}}$ ), 869(ms,  $\gamma_{\text{CH}_2}$ ) (Fig. S2). The crystal structure of **1** was determined by single crystal X-ray diffraction.

## Reference:

1. F. Y. Wen, J. H. Yang, X. Zong, B. J. Ma, D. G. Wang and C. Li, *J Catal*, 2011, **281**, 318-324.
2. M. Nyman, T. M. Alam, F. Bonhomme, M. A. Rodriguez, C. S. Frazer and M. E. Welk, *J Cluster Sci*, 2006, **17**, 197-219.

## Crystallography

During the refinement, the command 'omit-3 50' was used to omit the weak reflections above 50 degree. During the refinement, most of the non-H atoms were refined anisotropically, but some of the C and N atoms on en ligands are just refined isotropically due to their weak reflections. Furthermore, The  $[\text{Cu}_{15}(\text{en})_2]$  unit is disordered in two positions with 50% for each. All the C and N atoms on this fragment are also refined isotropically.

In the final refinement, four disordered  $\text{K}^+$  cations and 40 lattice water molecules are assigned from the difference Fourier Maps. Parts of the solvent water molecules can just be refined isotropically because of their obvious ADP problems. The rest cations or solvents cannot be exactly assigned from the weak reflections. Thus, the

SQUEEZE program was used to calculate and estimate the possible numbers of the cations and solvents in the accessible void of this crystal structure. The calculation result is shown below. Based on the SQUEEZE calculation results, elemental analysis and the TG analysis, as well as the charge-balance consideration, another two Na<sup>+</sup> cations and 80 water molecules were directly included in the final molecular formula. The \*.hkl generated by the SQUEEZE program was used to substitute the original \*.hkl to carry out more refinement cycles and obtain the final cif file.

In the final refinement, the highest residual peak  $2.40\text{e}\text{\AA}^{-3}$  was close to the heavy atom K3 with the distance of  $1.52\text{\AA}$  and featureless. It is noteworthy that there are extensive short connections between O(POM) and O(water) atoms in the range of  $2.50\text{-}2.90\text{\AA}$ , suggesting the extensive H-bonding interactions between solvent water molecules and the polyoxoanions, however, non suitable H atoms on water molecules can be found from the difference fourier maps. It is also worth noting that the restraint command 'isor' was used to restrain some non-H atoms with NPD and/or ADP problems. These atoms are as follows: C31 C32 C33 C34 N31 N32 N33 N34 C2 C9 N40 C42 C36 C28 C35 N39 C39 C27 C12 N41 C26 C24 C205 N210 C42 C33 C26 C23 C25 C24 C6 C5 C1 C41 K3>K6A. Furthermore, the bond distances and angles of most en ligands were fixed with the restrained command 'dfix'. All these restrained refinement led to a relative high restraint value of 262.

### Photocatalysis Experiments

The photocatalytic reaction was carried out in a Pyrex inner-irradiation-type reaction vessel with magnetic stirring at room temperature. The photocatalytic reactions were performed in 100 mL 10% TEA solution, containing  $1\times 10^{-4}$  mol/L compound **1** (0.1g) and 2.5 mmol/L Cobalt complex (0.1001g). Before the photocatalytic reaction, nitrogen gas was bubbled through the reaction mixture for 0.5h to remove air. The mixture was then irradiated using a Xe lamp (500W) with a Pyrex-glass filter ( $\lambda > 400$  nm). The H<sub>2</sub> produced was analyzed using a GC 7890T instrument.

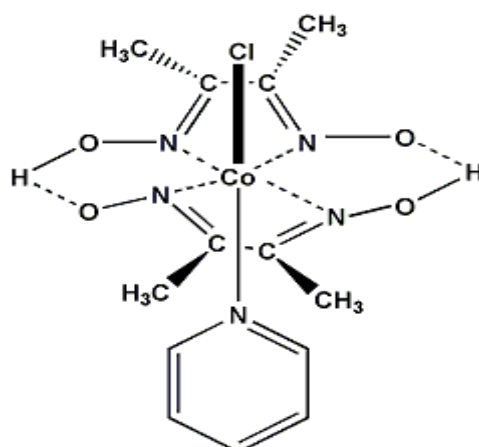

**Scheme S1.** Structure of  $\text{Co}^{\text{III}}(\text{dmgH})_2\text{pyCl}$  complex,

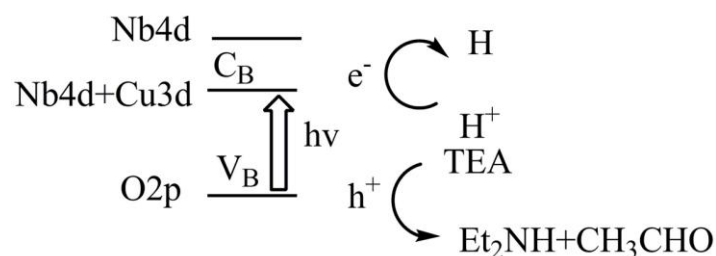

**Scheme S2.** The proposed mechanism of photocatalytic  $\text{H}_2$  production of **1** in the visible light. ( $\text{C}_\text{B}$ : Conduction Band;  $\text{V}_\text{B}$ : Valence Band;  $\text{h}^+$ : Photogenerated holes; D: electron donor; P: photosensitizer; C: electron carrier; Cat: proton reduction catalyst)

The schematic diagram for a homogeneous system for photocatalytic  $\text{H}_2$  production is shown in the following illustration (**Scheme S2**)<sup>[3-8]</sup>. The conduction band ( $\text{C}_\text{B}$ ) formed with the orbital of Nb4d and Cu3d in compound **1** is below the conduction band only consisting of Nb4d orbital, which make the energy gap (EG) narrower, finally the energy gap extends to the visible region, so the catalyst compound **1** is capable of photocatalytic  $\text{H}_2$  production in the visible light (**Scheme S2**)<sup>[3-8]</sup>.

The proposed mechanism of photocatalytic  $\text{H}_2$  production in the visible light of compound **1** is as follows: **Firstly**, the Cu(II) of dimmer polyoxoniobate (**1**,

photosensitizer) yields its excited-state ( $\mathbf{1}^*$ ) after a certain wavelengths of light irradiation; **Secondly**,  $\mathbf{1}^*$  obtains electrons from TEA (electron donor), and donates the excited electrons to the Co(III) complexes surface (proton reduction catalyst); **Thirdly**, the  $\text{H}^+$  obtains the electron from the Co(III) complexes surface to be reduced to H atom to form  $\text{H}_2$ <sup>[3-8]</sup>.

**Reference:**

3. A. Ioannidis, E. Papaconstantinou, *Inorg. Chem.* 1985, **24**, 439-441;
4. R. Akid, J. R. Darwent, *J. Chem. Soc. Dalton Trans.* 1985, 195-399;
5. T. Yamase, R. Watanabe, *J. Chem. Soc. Dalton Trans.* 1986, 1669-1675;
6. J. R. Darwent, *J. Chem. Soc., Chem. Commun.*, 1982, 798-799;
7. Y. H. Guo, C. W. Hu, *J. Mole. Catal. A: Chem.*, 2007, 262, 136-148;
8. A. Kudo, Y. Miseki, *Chem. Soc. Rev.*, 2009, 38, 253-278.

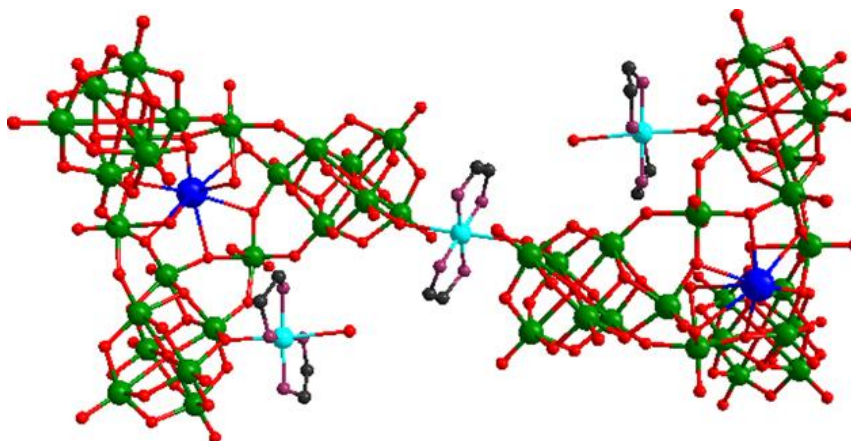

**Fig. S1.** The ball-and-stick representation of the dimer polyanion of **1**. Color codes: {Nb}, green; K (blue), Cu (cyan), C (grey), N (pink) and O (red).

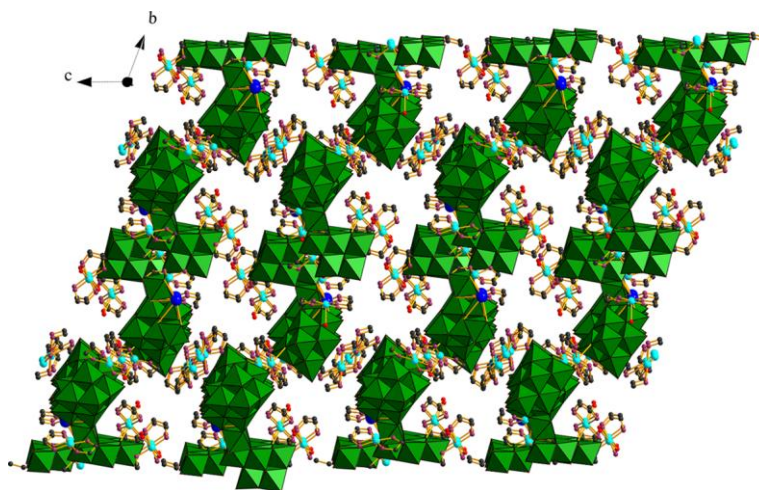

**Fig. S2.** The packing arrangement of compound **1** viewed along *a* axis.

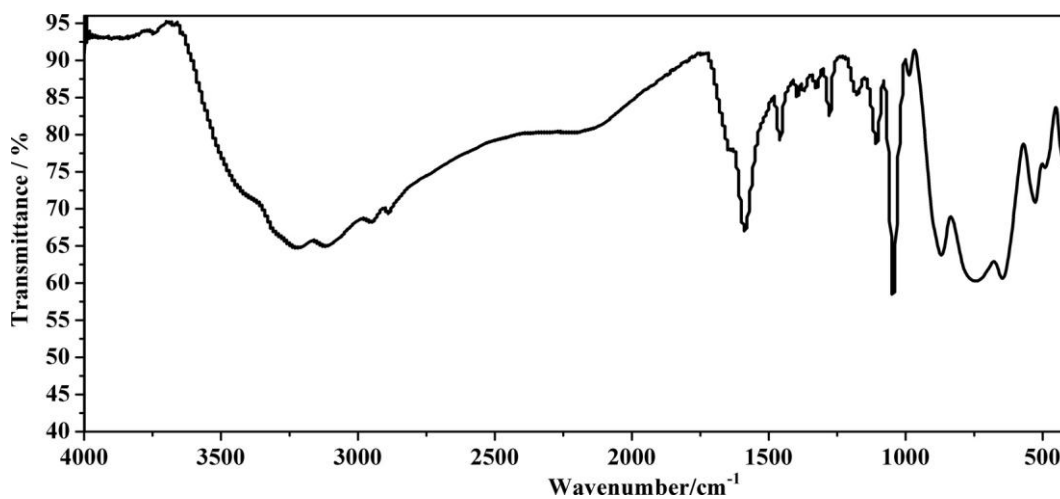

**Fig.S3.** IR spectrum of **1**

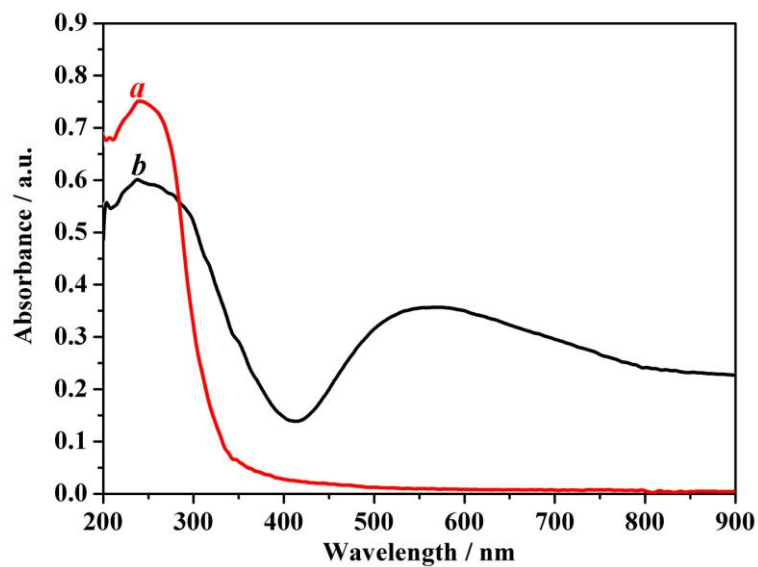

**Fig.S4.** UV-Vis diffuse reflectance spectra of a)  $K_8 [Nb_6O_{19}] \cdot 16H_2O$  and b) compound **1**.

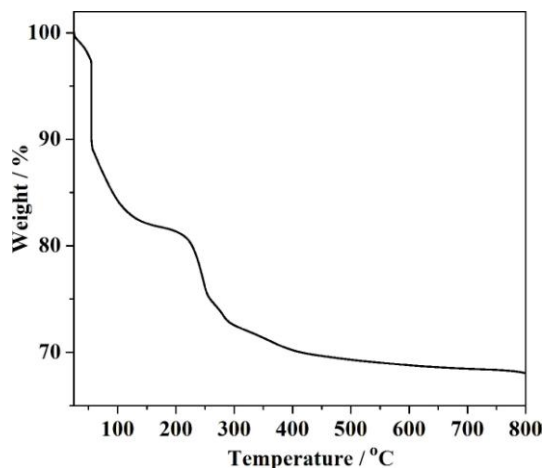

**Fig. S5.** TG of compound **1**. Compound **1** exhibit two weight loss steps in the temperature range 30-800°C, the first weight loss is 19.4% (theoretical value 19.2%) in the temperature range 30-220°C, corresponding to the loss of noncoordinated and coordinated water molecules. And the second weight loss is 11.9% in the temperature range 220-600°C, corresponding to the loss of ethanediamine molecules, which is consistent with the theoretical value 11.7%.

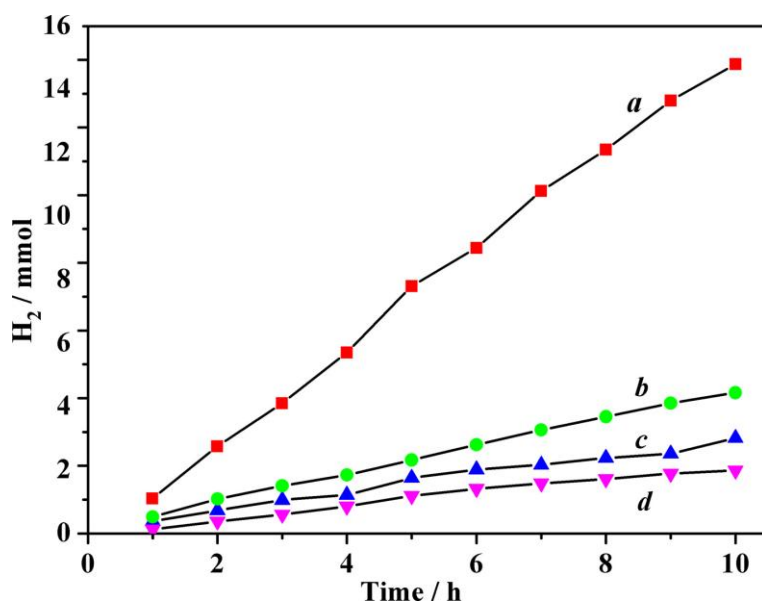

**Fig. S6.** Time courses of photocatalytic H<sub>2</sub> evolution over Co(dmgh)<sub>2</sub>pyCl/ **1** hybrid system in 100 mL solution (line a,b,c,d: 0 vol.%, 30 vol. %, 45 vol.% and 60 vol.% acetonitrile )under visible light irradiation ( $\lambda > 400$  nm). Compound **1** (0.1g); Co<sup>III</sup>(dmgh)<sub>2</sub>pyCl(0.25 mM); 10 vol.% TEA (total solution volume 100 mL, 0.72mM); light source, Xe lamp (500 W).



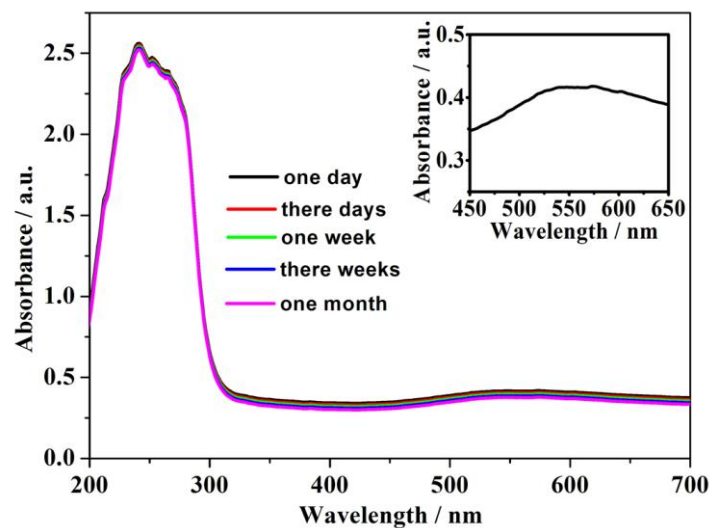

**Fig. S7.** UV-Vis spectra of compound **1** kept at room temperature. The insert figure is the UV-Vis spectra of compound **1** in the rang of 450~650nm.

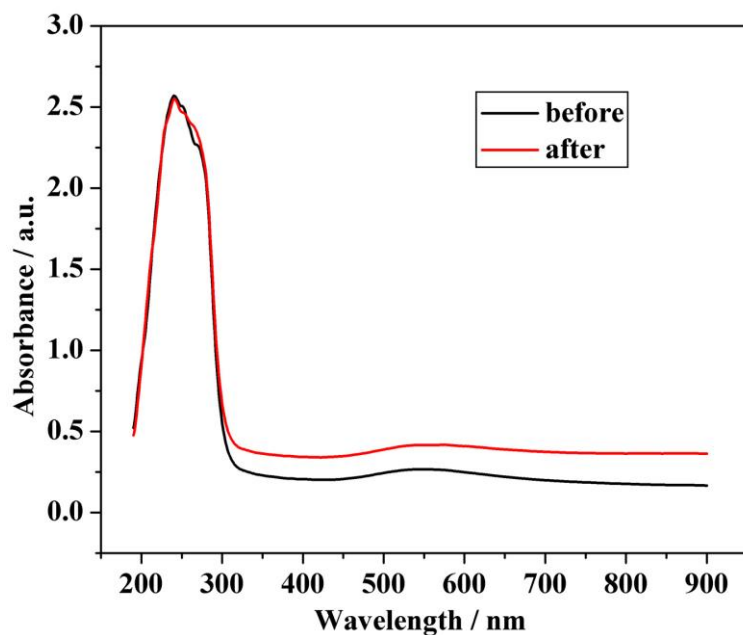

**Fig.S8.** UV-Vis spectra of compound **1** before(black) and after(red) 5 runs of the photocatalytic reactions with 100mg compound **1** and 0.25mmol cobaloximes in 100mL 10% TEA solution.



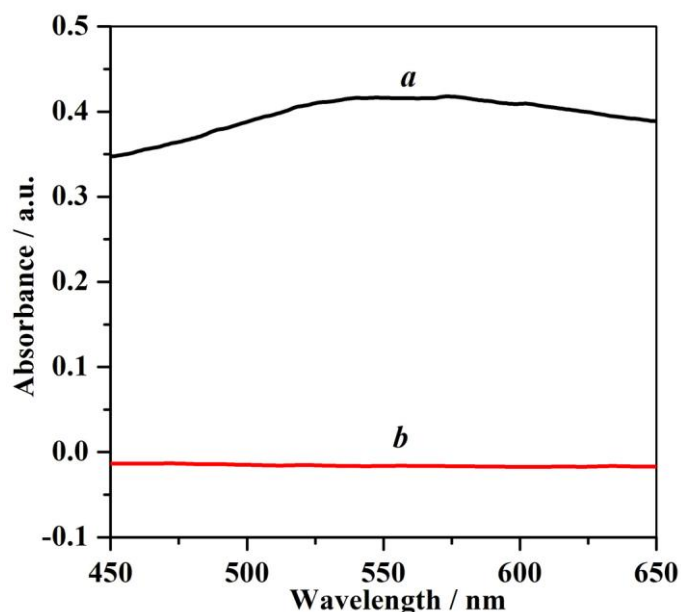

**Fig. S9.** UV-Vis spectra of a) compound **1** and b)  $K_8[Nb_6O_{19}] \cdot 16H_2O$ . From Fig. S9, there is a wide absorption at 550nm in the visible region in compound **1**, but there is no adsorption of  $K_8[Nb_6O_{19}] \cdot 16H_2O$ , we can conclude that the  $[Cu(en)_2]$  cation still remains coordinating to the polyoxoniobate in solution.

**Table S1.** Crystal data and structure refinement for **1**

|                                    |                                                                                                                                                                                      |
|------------------------------------|--------------------------------------------------------------------------------------------------------------------------------------------------------------------------------------|
| <b>Empirical formula</b>           | $C_{44}H_{434}Cu_{11}K_6N_{44}Na_2Nb_{48}O_{264}$                                                                                                                                    |
| <b>Formula weight</b>              | 11245.55                                                                                                                                                                             |
| <b>Temperature</b>                 | 296(2) K                                                                                                                                                                             |
| <b>Wavelength</b>                  | 0.71073 Å                                                                                                                                                                            |
| <b>Crystal system, space group</b> | Triclinic, P-1                                                                                                                                                                       |
| <b>Unit cell dimensions</b>        | $a = 24.2748(16) \text{ \AA}$ $\alpha = 110.3980(10)^\circ$<br>$b = 25.4804(17) \text{ \AA}$ $\beta = 95.0640(10)^\circ$<br>$c = 34.443(2) \text{ \AA}$ $\gamma = 96.8080(10)^\circ$ |
| <b>Volume</b>                      | $19634(2) \text{ \AA}^3$                                                                                                                                                             |
| <b>Z, Calculated density</b>       | 2, $1.902 \text{ Mg/m}^3$                                                                                                                                                            |
| <b>Absorption coefficient</b>      | $2.086 \text{ mm}^{-1}$                                                                                                                                                              |
| <b>F(000)</b>                      | 11082                                                                                                                                                                                |
| <b>Crystal size</b>                | $0.25 \times 0.23 \times 0.20 \text{ mm}$                                                                                                                                            |

|                                                         |                                                              |
|---------------------------------------------------------|--------------------------------------------------------------|
| <b>Theta range for data collection</b>                  | 0.99 to 25.00 deg.                                           |
| <b>Limiting indices</b>                                 | $-24 \leq h \leq 28, -30 \leq k \leq 28, -40 \leq l \leq 37$ |
| <b>Reflections collected / unique</b>                   | 101071 / 68353 [ $R_{\text{int}}=0.0213$ ]                   |
| <b>Completeness to theta = 25.00</b>                    | 98.9 %                                                       |
| <b>Absorption correction</b>                            | Semi-empirical from equivalents                              |
| <b>Max. and min. transmission</b>                       | 0.6804 and 0.6236                                            |
| <b>Refinement method</b>                                | Full-matrix least-squares on $F^2$                           |
| <b>Data / restraints / parameters</b>                   | 68353 / 262 / 3015                                           |
| <b>Goodness-of-fit on <math>F^2</math></b>              | 1.076                                                        |
| <b>Final R indices [<math>I &gt; 2\sigma(I)</math>]</b> | $R_1 = 0.0500, wR_2 = 0.1272$                                |
| <b>R indices (all data)</b>                             | $R_1 = 0.0768, wR_2 = 0.1351$                                |
| <b>Largest diff. peak and hole</b>                      | 2.409 and $-1.331 \text{ e}\text{\AA}^{-3}$                  |

**Table S2.** The TON values of photocatalysis experiments by soluble compound **1**.

$$\text{TON} = n_{\text{H}_2}/n_{\text{catalyst}}$$

| Run      | Compound 1<br>concentration<br>(mM) | Co(III)<br>concentration<br>(mM) | TON value of<br>UV | TON value of<br>Vis |
|----------|-------------------------------------|----------------------------------|--------------------|---------------------|
| <b>1</b> | 0.089                               | 0.25                             | 111                | 1.6                 |
| <b>2</b> | 0.089                               | 0.25                             | 106                | 1.6                 |
| <b>3</b> | 0.089                               | 0.25                             | 114                | 1.5                 |
| <b>4</b> | 0.089                               | 0.25                             | 106                | 1.6                 |
| <b>5</b> | 0.089                               | 0.25                             | 111                | 1.5                 |
